# Supplementary material
Source: publisher figshare collection journal article supplement (https://acs.figshare.com/ndownloader/files/4767640)
Supplement: Supplementary file 1 [file 4767640]

## Supporting Information

### Thickness-Dependent Thermal Conductivity of Suspended Two-Dimensional Single-Crystal In<sub>2</sub>Se<sub>3</sub> Layers Grown by Chemical Vapor Deposition

S. Zhou, X. Tao, and Y. Gu

Department of Physics and Astronomy, Washington State University, Pullman, WA  
99164-2814

#### Determination of the full-width-at-half-maximum (FWHM) of the 632 nm laser beam

In a previous study,<sup>S1</sup> we used an auto-correlation method to measure the FWHM (~ 445 nm) of the 517 nm laser beam focused through the same 100 X objective used here on a blank SiO<sub>2</sub>/Si substrate. As the FWHM is proportional to the wavelength, we obtained a FWHM (~ 544 nm) for the 632 nm laser beam.

Table S1 Material parameters used in simulations

|                                | Thermal conductivity<br>(W/m*K) | In <sub>2</sub> Se <sub>3</sub> Interface Thermal<br>conductance (MW/m <sup>2</sup> K) |
|--------------------------------|---------------------------------|----------------------------------------------------------------------------------------|
| Si                             | 130                             |                                                                                        |
| Si <sub>3</sub> N <sub>4</sub> | 30                              | 50                                                                                     |
| Air                            | 0.0257                          | 0.127                                                                                  |

#### Simulated temperature

The average simulated temperature ( $T_m$ ) was obtained through the following equation,<sup>S2</sup>  $T_m \approx \frac{\int_0^R T_1(r)q(r)rdr}{\int_0^R q(r)rdr}$ .  $T_1(r)$  is the temperature profile inside the hole,  $R$  is the beam width, and  $q(r)$  is the volumetric Gaussian beam heating:<sup>2</sup>  $q(r) =$

$\frac{P_{abs}}{\pi r_0^2 t} \exp\left(-\frac{r^2}{r_0^2}\right)$ , where  $r_0$  is half of the beam width, and  $P_{abs}$  is the absorbed laser power given by  $P_0(1 - e^{-\alpha t})$ , with  $P_0$  as the incident laser power,  $\alpha$  as the measured absorption coefficient for the 632-nm laser, and  $t$  as the layer thickness. The matching between this temperature and the temperature measured by the Raman spectroscopy allowed for the determination of  $k_{//}$ .

### Callaway Model:

The following Callaway model equations were used for fitting.

$$k(T) = \frac{k_B}{2\pi^2 c} \left(\frac{k_B T}{\hbar}\right)^3 \int_0^{\theta_D/T} \tau_c \frac{x^4 e^x}{(e^x - 1)^2} dx \quad (1)$$

$$\tau_c^{-1} = \frac{c}{t} + A\omega^4 + B\omega^2 T e^{-\frac{\theta_D}{3T}} \quad (2)$$

where  $\omega$  is the phonon frequency,  $k_B$  is the Boltzman constant,  $\theta_D$  is the Debye temperature,  $\hbar$  is the reduced Plank constant,  $x$  is given by  $\hbar\omega/k_B T$ ,  $T$  is the absolute temperature,  $c$  is the velocity of sound (average  $c = 2500$  m/s), and  $t$  is layer thickness.<sup>S3</sup> As  $\theta_D$  is unknown for  $\text{In}_2\text{Se}_3$ , we used the  $\theta_D$  in silicon (645 K). The fitting of the experimental results was obtained by optimizing the values of  $A$  and  $B$ , which are approximately  $2.7 \times 10^{-43} \text{ s}^3$  and  $1.5 \times 10^{-20} \text{ s/K}$ , respectively.

### **References:**

- <sup>S1</sup> Tao, X.; Mafi, E.; Gu, Y. Synthesis and Ultrafast Carrier Dynamics of Single-Crystal Two-Dimensional  $\text{CuInSe}_2$  Nanosheets. *J. Phys. Chem. Lett.* **2014**, *5*, 2857-2862.
- <sup>S2</sup> Lee, J. U.; Yoon, D.; Kim, H.; Lee, S. W.; Cheong, H. Thermal Conductivity of Suspended Pristine Graphene Measured by Raman Spectroscopy. *Phys. Rev. B* **2011**, *83*, 081419-4.

<sup>S3</sup> Park, N. W.; Lee, W. Y.; Kim, J. A.; Song, K.; Lim, H.; Kim, W. D.; Yoon, S. G.; Lee, S. K. Reduced temperature-dependent thermal conductivity of magnetite thin films by controlling film thickness. *Nanoscale Res. Lett.* **2014**, 9, 96-8.
